# Supplementary material for: Autophagy in T cells from aged donors is maintained by spermidine and correlates with function and vaccine responses
Source: eLife. 2020 Dec 15;9:e57950. doi: 10.7554/eLife.57950 (PMC7744099; doi:10.7554/eLife.57950)
Supplement: Figure 1—figure supplement 2—source data 1. [file elife-57950-fig1-figsupp2-data1.xlsx]

## Sheet: Monocytes
Donor1
IFNg 1 + Baf	IFNg 2 + Baf	IFNg 3 + Baf	IFNg 1	IFNg 2	IFNg 3	LPS 1 + Baf	LPS 2 + Baf	LPS 3 + Baf	LPS 1	LPS 2	LPS 3	BafA 1	BafA 2	BafA 3
1.6	1.57	1.39	0.06	0.01	0	1.2	1.24	1.19	0	0.02	0	1.36	0.98	1.05
Donor 2
IFNg 1 + Baf	IFNg 2 + Baf	IFNg 3 + Baf	IFNg 1	IFNg 2	IFNg 3	LPS 1 + Baf	LPS 2 + Baf	LPS 3 + Baf	LPS 1	LPS 2	LPS 3	BafA 1	BafA 2	BafA 3
1.93	1.96	1.69	0.23	0.08	0.15	1.38	1.35	1.28	0.04	0	0	1.54	1	1.49
Donor 3
IFNg 1 + Baf	IFNg 2 + Baf	IFNg 3 + Baf	IFNg 1	IFNg 2	IFNg 3	LPS 1 + Baf	LPS 2 + Baf	LPS 3 + Baf	LPS 1	LPS 2	LPS 3	BafA 1	BafA 2	BafA 3
1.73	1.82	2.2	0	0.02	0.12	1.65	1.55	2.12	0	0.09	0.19	1.63	1.4	1.38
Donor 4
IFNg 1 + Baf	IFNg 2 + Baf	IFNg 3 + Baf	IFNg 1	IFNg 2	IFNg 3	LPS 1 + Baf	LPS 2 + Baf	LPS 3 + Baf	LPS 1	LPS 2	LPS 3	BafA 1	BafA 2	BafA 3
1.35	1.45	1.24	0	0.07	0.02	1.01	1.49	1.1	0	0.03	0.02	1.21	1.14	0.93
Donor 5
IFNg 1 + Baf	IFNg 2 + Baf	IFNg 3 + Baf	IFNg 1	IFNg 2	IFNg 3	LPS 1 + Baf	LPS 2 + Baf	LPS 3 + Baf	LPS 1	LPS 2	LPS 3	BafA 1	BafA 2	BafA 3
1.15	0.94	0.84	-0.01	0.03	-0.04	1.54	1.58	1.57	0.06	0.15	0.2	1.55	1.89	1.48

## Sheet: B cells
Donor1
IgM/ CD40L 1 + Baf	IgM/ CD40L 2 + Baf	IgM/ CD40L 3 + Baf	IgM/ CD40L 1	IgM/ CD40L 2	IgM/ CD40L 3	BafA 1	BafA 2	BafA 3
1.27	1.08	1.11	0.36	0.32	0.3	0.56	0.42	0.4
Donor2
IgM/ CD40L 1 + Baf	IgM/ CD40L 2 + Baf	IgM/ CD40L 3 + Baf	IgM/ CD40L 1	IgM/ CD40L 2	IgM/ CD40L 3	BafA 1	BafA 2	BafA 3
1.28	1.16	1.02	0.18	0.35	0.12	0.61	0.38	0.54
Donor3
IgM/ CD40L 1 + Baf	IgM/ CD40L 2 + Baf	IgM/ CD40L 3 + Baf	IgM/ CD40L 1	IgM/ CD40L 2	IgM/ CD40L 3	BafA 1	BafA 2	BafA 3
1.18	1.37	1.41	0.04	0.25	0.12	0.51	0.77	0.56
Donor4
IgM/ CD40L 1 + Baf	IgM/ CD40L 2 + Baf	IgM/ CD40L 3 + Baf	IgM/ CD40L 1	IgM/ CD40L 2	IgM/ CD40L 3	BafA 1	BafA 2	BafA 3
0.92	1	1.31	0.25	0.33	0.5	0.52	0.38	0.55
Donor5
IgM/ CD40L 1 + Baf	IgM/ CD40L 2 + Baf	IgM/ CD40L 3 + Baf	IgM/ CD40L 1	IgM/ CD40L 2	IgM/ CD40L 3	BafA 1	BafA 2	BafA 3
1.16	1.49	1.23	0.27	0.5	0.35	0.5	0.69	0.56

## Sheet: CD4 T cells
Donor1
CD3/CD28 1 + Baf	CD3/CD28 2 + Baf	CD3/CD28 3 + Baf	CD3/CD28 1	CD3/CD28 2	CD3/CD28 3	BafA 1	BafA 2	BafA 3
0.83	1.17	0.96	0.18	0.4	0.37	0.36	0.18	0.18
Donor2
CD3/CD28 1 + Baf	CD3/CD28 2 + Baf	CD3/CD28 3 + Baf	CD3/CD28 1	CD3/CD28 2	CD3/CD28 3	BafA 1	BafA 2	BafA 3
1.2	1.13	1.12	0.56	0.38	0.33	0.26	0.16	0.25
Donor3
CD3/CD28 1 + Baf	CD3/CD28 2 + Baf	CD3/CD28 3 + Baf	CD3/CD28 1	CD3/CD28 2	CD3/CD28 3	BafA 1	BafA 2	BafA 3
1.01	1.28	1.17	0.16	0.34	0.19	0.23	0.27	0.15
Donor4
CD3/CD28 1 + Baf	CD3/CD28 2 + Baf	CD3/CD28 3 + Baf	CD3/CD28 1	CD3/CD28 2	CD3/CD28 3	BafA 1	BafA 2	BafA 3
2.2	1.38	1.73	0.9	0.68	0.79	0.47	0.26	0.37
Donor5
CD3/CD28 1 + Baf	CD3/CD28 2 + Baf	CD3/CD28 3 + Baf	CD3/CD28 1	CD3/CD28 2	CD3/CD28 3	BafA 1	BafA 2	BafA 3
1.4	1.67	1.64	0.56	0.55	0.47	0.14	0.27	0.21

## Sheet: CD8 T cells
Donor1
CD3/CD28 1 + Baf	CD3/CD28 2 + Baf	CD3/CD28 3 + Baf	CD3/CD28 1	CD3/CD28 2	CD3/CD28 3	BafA 1	BafA 2	BafA 3
0.77	0.87	0.72	0.13	0.32	0.3	0.42	0.25	0.23
Donor2
CD3/CD28 1 + Baf	CD3/CD28 2 + Baf	CD3/CD28 3 + Baf	CD3/CD28 1	CD3/CD28 2	CD3/CD28 3	BafA 1	BafA 2	BafA 3
0.88	0.72	0.72	0.35	0.2	0.19	0.38	0.25	0.34
Donor3
CD3/CD28 1 + Baf	CD3/CD28 2 + Baf	CD3/CD28 3 + Baf	CD3/CD28 1	CD3/CD28 2	CD3/CD28 3	BafA 1	BafA 2	BafA 3
0.86	1.06	0.96	0.14	0.28	0.14	0.33	0.38	0.26
Donor4
CD3/CD28 1 + Baf	CD3/CD28 2 + Baf	CD3/CD28 3 + Baf	CD3/CD28 1	CD3/CD28 2	CD3/CD28 3	BafA 1	BafA 2	BafA 3
1.45	0.93	1.21	0.58	0.48	0.63	0.41	0.26	0.4
Donor5
CD3/CD28 1 + Baf	CD3/CD28 2 + Baf	CD3/CD28 3 + Baf	CD3/CD28 1	CD3/CD28 2	CD3/CD28 3	BafA 1	BafA 2	BafA 3
1.39	1.54	1.45	0.62	0.58	0.5	0.26	0.38	0.28
