# Supplementary material for: Autophagy in T cells from aged donors is maintained by spermidine and correlates with function and vaccine responses
Source: eLife. 2020 Dec 15;9:e57950. doi: 10.7554/eLife.57950 (PMC7744099; doi:10.7554/eLife.57950)
Supplement: Figure 1—source data 1. [file elife-57950-fig1-data1.xlsx]

## Sheet: Figure 1c
	HCV non-specific CD8+ T cells																				HCV specific CD8+ T cells
Basal					0.27	0.24	0.34	0.26					0.3	0.27	0.29	0.23	0.08	0.14	0.28	0.27
Post Prime	0.15	0.17	0.11	0.1	0.28	0.29	0.28	0.27	0.15	0.18	0.15	0.19	0.28	0.23	0.28	0.2	0.19	0.36	0.2	0.13	0.36	0.46	0.22	0.23	0.5	0.52	0.37	0.44	0.36	0.42	0.37	0.43	0.57	0.44	0.61	0.58	1.55	1.57	0.32	0.4
Post Boost	0.19	0.17	0.13	0.13	0.26	0.24	0.31	0.21	0.14	0.16	0.13	0.16	0.28	0.24	0.34	0.29	0.18	0.21	0.17	0.16	0.4	0.39	0.22	0.2	0.7	0.66	0.74	0.48	0.38	0.36	0.22	0.25	0.43	0.32	0.34	0.34	0.29	0.32	0.23	0.24
End of study	0.25	0.14	0.07	0.02	0.32	0.27	0.28	0.22	0.22	0.21	0.12	0.17	0.24	0.19	0.26	0.22	0.22	0.15	0.1	0.11	0.05	0.18	0.14	0.04	0.44	0.36	0.34	0.28	0.23	0.32	0.09	0.12	0.25	0.23	0.3	0.26	0.31	0.32	0.28	0.27

## Sheet: Figure 1d
	Young	Old
	1.74	0.13369
	1.97	0.289044
	2.11	0.240088
	1.43	0
	1.44	0.583519
	1.18	0.170918
	1.2	0.376744
	0.74	0.0857909
	0.93	0.52
	0.33	0.64
	0.55	0.9
	0.6	1.09
	0.51
	0.38
	1.6
	0.74
	0.504
	1.2
	2.7
	1.09
	1.8

## Sheet: Figure 1e
	Autophagy	Sum peptide pool
	0.13369	227
	0.289044	130
	0.240088	847
	0	107
	0.583519	565
	0.170918	133
	0.376744	543
	0.0857909	190
	0.52	235
	0.64	525
	0.9	363
	1.09	862

## Sheet: Figure 1f
	Autophagy	Sum peptide pool
	1.74	493
	1.97	355
	2.11	1170
	1.43	1708
	1.44	1675
	1.18	2393
	1.2	3305
	0.74	1545
	0.93	2762
	0.33	318
	0.55	888
	0.6	1518
	0.51	2165
	0.38	2180
	1.6	2555
	0.74	155
	0.504	1070
	1.2	530
	2.7	403
	1.09	217
	1.8	132
