# Supplementary material for: Autophagy in T cells from aged donors is maintained by spermidine and correlates with function and vaccine responses
Source: eLife. 2020 Dec 15;9:e57950. doi: 10.7554/eLife.57950 (PMC7744099; doi:10.7554/eLife.57950)
Supplement: Figure 2—source data 1. [file elife-57950-fig2-data1.xlsx]

## Sheet: Figure 2a
											Ctrl	Atg7Δcd4
											278.726	23.45
											290.541	20.34
											165.862	1.69
											127.93
											289.609
											219.963

## Sheet: Figure 2b
Ctrl	Atg7Δcd4
101	48.4
80.7	21.7
91.1	47.1
58.8
101
89.1
95.5

## Sheet: Figure 2c
Ctrl	Atg7Δcd4
742	283
576	413
746	568
591
636
728
605

## Sheet: Figure 2d
Vehicle	HcQ	SbI
8647.7	246.01	940.03
9346.35	41.48	4.481
7456.66	918.7	209.48
5359.9	557.59	557.59

## Sheet: Figure 2e
Vehicle	HcQ	SbI
1040.5		493.75
915.25		596.5
1030.5		563.25
798	63.3
396.45	35.73
729	19.5
327.45	24
573	171

## Sheet: Figure 2f
Vehicle	HcQ	SbI
2023		555
666		132
1083		254
892		351
3148	684
1914	810
1362	588
1638	534

## Sheet: Figure 2g
Vehicle	Res
10350.5	14059.6
16614.4	31585.5
8578.39	10861.3
19621.2	37016.7
6864.5	12663
4603.07	9844.92
7141.88	9090.17
6294.36	10608.4

## Sheet: Figure 2h
Vehicle	Res
4162	6179
3661	3768
2152	2692
2442	5750
4122	4926

## Sheet: Figure 2i
Vehicle	Res
2023	2948
1665	2102.5
1083	2102.5
1242	3930
3148	3930
