# Supplementary material for: Autophagy in T cells from aged donors is maintained by spermidine and correlates with function and vaccine responses
Source: eLife. 2020 Dec 15;9:e57950. doi: 10.7554/eLife.57950 (PMC7744099; doi:10.7554/eLife.57950)
Supplement: Figure 3—figure supplement 1—source data 1. [file elife-57950-fig3-figsupp1-data1.xlsx]

## Sheet: Figure 3—figure supplement 1a
											Old	Old+Spd	Old+Spm
											552	762	4.46
											486	622	46.6
											232	284	15.8
											470	448	128.8
											505.5	859.5
											682	928.667
											386	621

## Sheet: Figure 3—figure supplement 1b
											Old	Old+Spd	Old+Spm
											513	594	231.6
											342	396	441
											758.25	1289.25	260.4
											1023	1393	831
											579	931.5
											1023	1393

## Sheet: Figure 3—figure supplement 1c
											Old	Old+Spd	Old+Spm
											1612	1590	3084
											1013	1152	1256
											791	1300	1231
											3169	2837	1597
											2929	6092
