# Supplementary material for: Autophagy in T cells from aged donors is maintained by spermidine and correlates with function and vaccine responses
Source: eLife. 2020 Dec 15;9:e57950. doi: 10.7554/eLife.57950 (PMC7744099; doi:10.7554/eLife.57950)
Supplement: Figure 3—figure supplement 2—source data 1. [file elife-57950-fig3-figsupp2-data1.xlsx]

## Sheet: Figure 3—figure supplement 2a
											Old	Old+Spd
											0.21151	0.360639
											2.11929	0.0388096
											0.922516	0.667927
											1	0.401252
											1.40777	1.43256
											1.08857	0.628229

## Sheet: Figure 3—figure supplement 2b
											Old	Old+Spd
											1.31914	1.18614
											0.488388	1.01654
											1.19247	1.11365
											0.792962	0.247454
											1.66066	1.07395
											0.546382	0.426155

## Sheet: Figure 3—figure supplement 2c
											Old	Old+Spd
											0.649254	1.8041
											1.09515	0.942164
											1.2556	1.41604
											1.84179	1.45222
											0.783339	0.911446
											0.374869	0.846342

## Sheet: Figure 3—figure supplement 2d
Old	Old+Spd
1.14494	0.736772
0.96815	0.918066
1.06861	0.886908
1.43766	0.127796
0.847204	0.167237
1.00375	0.984308
