# Supplementary material for: Autophagy in T cells from aged donors is maintained by spermidine and correlates with function and vaccine responses
Source: eLife. 2020 Dec 15;9:e57950. doi: 10.7554/eLife.57950 (PMC7744099; doi:10.7554/eLife.57950)
Supplement: Figure 3—source data 1. [file elife-57950-fig3-data1.xlsx]

## Sheet: Figure 3a
											age	Spd	Put	Spm
											22	0.6836	0.0679876	1.05844
											34	1.11888	0.127028	1.95328
											45	0.846443	0.0883429	1.14507
											45	0.962719	0.183724	1.05914
											47	0.929974	0.0959914	2.01715
											41	0.436367	0.0750502	0.412812
											55	0.587721	0.140118	1.42654
											82	0.331945	0.016658	0.514552
											68	0.383497	0.0369879	0.821245
											69	0.415733	0.0485277	1.48394

## Sheet: Figure 3b
Old	Old+Spd
0.0814815	0.27582
0.160461	0.316522
0.30093	0.379975
0.2	0.52126

## Sheet: Figure 3c
Old	Old+Spd	Old+Spd	Old+Spd
8647.7	14583.4	155.15	4995
9346.35	11857.6	926.925	242.05
7456.66	20126	967.095	836.865
5359.9	15190.6	963.2	4638.4
7126.03	19293.1	1116.5	1984.15
11030.6	16733.2
13572.5	14546.7
5908.1	12934.2
5630.56	11333.2
4324.23	10124.7
5737.38	8070.73
5737.38	8070.73

## Sheet: Figure 3d
Old	Old+Spd	Old+Spd	Old+Spd
552	762	123.6	0
486	622	61.8	0
232	284	0	0
470	448	100.4	0
505.5	859.5	162	63.5
682	928.667	360.333	373
386	621	386.5	241
375	485
272	609
695	816
285	536
63.7	205
540	732
222	235
205	225
382	349
459	500
405	582

## Sheet: Figure 3e
Old	Old+Spd	Old+Spd	Old+Spd
513	594	531	0
342	396	354	0
758.25	1289.25	243	95.25
1023	1393	540.5	559.5
579	931.5	579.75	361.5
1023	1393	540.5	559.5
216	480
140	236
370	412
556	865.143
308.286	412.571
346.143	352.714
500	564
206	237
393	736
677	1222
453	478

## Sheet: Figure 3f
Old	Old+Spd	Old+Spd	Old+Spd
1612	1590	2286
1013	1152	945
791	1300	652
3169	2837	1339
3999	4258	901	393
4973	4616	4972	4156
2929	4092	2174	1824
1285	1741
1839	1068
1772	2327
2636	1965
1580	1661
1419	1081
2115	1767
2528	2688
1315	2170
1640	1840
1780	1646
