# Supplementary material for: Autophagy in T cells from aged donors is maintained by spermidine and correlates with function and vaccine responses
Source: eLife. 2020 Dec 15;9:e57950. doi: 10.7554/eLife.57950 (PMC7744099; doi:10.7554/eLife.57950)
Supplement: Figure 4—source data 1. [file elife-57950-fig4-data1.xlsx]

## Sheet: Figure 4a
												CD3/CD28						CD3/CD28 + DFMO						CD3/CD28 + DFMO + Spd
											d1	0.888889	0.25	0.571429	0.769231	0.540541	0.875	0.333333	0.25	0.285714	0.0769231	0.459459	0.5	1.77778	1	1.14286	0.769231	1.56757	1.125
											d2	0.888889	1.91667	0.714286	0.769231	1.2973	1.75	0.333333	1.33333	0.428571	0.538462	0.72973	0.75	1.66667	2	1.85714	1.15385	2.05405	1.875
											d3	2.77778	1.33333	2.85714	3.46154	1.7027	2.5	1.333	0.166667	1.28571	1.53846	0.243243	1.75	2.55556	1.33333	2.57143	2.30769	2.83784	2.625
											d4	3	5.41667	2.57143	2.15385	2.16216	2.625	1	1.91667	0.857143	0.307692	0.864865	1.125	2.88889	2.91667	5.57143	2.61538	2.08108	3.25
											d5	2.111	1.66667	2.14286	1.30769	1.16216	1.125	1.22222	0.333333	0.142857	0.461538	0.513514	0.75	2.88889	1.5	4.71429	2.46154	2.62162	2.375
											d6	1.11111	1.33333	0.857143	1.53846	0.567568	1.5	1.44444	0.916667	0.428571	0.307692	0.216216	0.375	1.77778	1.16667	1.42857	1	1.45946	1.125
											d7	1.33333	0.583333	0.857143	1.30769	0.702703	1.5	0.555556	0.25	0.714286	0.692308	0.378378	0.75	1.66667	1.25	1.14286	1.15385	1.48649	1.375

## Sheet: Figure 4b
Vehicle	DFMO	DFMO + Spd
167	169	198
200	136	256
162	126	236

## Sheet: Figure 4c
Vehicle	DFMO	DFMO + Spd
336	305	389
378	332	462
395.25	276.75	423.75

## Sheet: Figure 4d
Vehicle	DFMO	DFMO + Spd
1024.4	1089.4	1235
1231	907	1293
1189	928	1314

## Sheet: Figure 4e
Young	Young+Spd
333	352
391	381
321	427

## Sheet: Figure 4f
Young	Young+Spd
300	244
712	421
220.1	307

## Sheet: Figure 4g
Young	Young+Spd
664	554
1196	971
338	849
