# Supplementary material for: Autophagy in T cells from aged donors is maintained by spermidine and correlates with function and vaccine responses
Source: eLife. 2020 Dec 15;9:e57950. doi: 10.7554/eLife.57950 (PMC7744099; doi:10.7554/eLife.57950)
Supplement: Figure 5—figure supplement 1—source data 1. [file elife-57950-fig5-figsupp1-data1.xlsx]

## Sheet: Figure 5—figure supplement 1
											TFEB
											unstim	Vehicle	Spd
											1.00005	2.70378	2.94953
											1.00061	1.41973	1.48902
											0.802206	1.33079	1.04552
											1.00039	1.46857	1.13317
												1.63188	1.52691
											Hyp
											unstim	Vehicle	Spd
											1.04	1.40647	1.32088
											1.07	1.36538	1.35766
											1.01	1.26885	1.251
											1.0477	1.26076	1.32803
												1.26437	1.23575
