# Supplementary material for: Autophagy in T cells from aged donors is maintained by spermidine and correlates with function and vaccine responses
Source: eLife. 2020 Dec 15;9:e57950. doi: 10.7554/eLife.57950 (PMC7744099; doi:10.7554/eLife.57950)
Supplement: Figure 5—figure supplement 2—source data 1. [file elife-57950-fig5-figsupp2-data1.xlsx]

## Sheet: Figure 5—figure supplement 2a
											WT	KO
											1.09053	0.658772
											1.16665	0.208222
											0.873059	0.148485
											1.00982	0.47577
											1.09325	0.246536
											0.766701	0.128192

## Sheet: Figure 5—figure supplement 2b
WT	KO	KO
161	47	47
115	38.2	38.2
109	45.2	38.1
108	46.4	36.4

## Sheet: Figure 5—figure supplement 2c
WT	KO	KO
480	406	406
499	422	330
511	419	414
464	373	373

## Sheet: Figure 5—figure supplement 2d
WT	KO	KO
127.2	151.2	233
82.8	216	142.2
218	222	148.5
5.96	350	145
