# Supplementary material for: Autophagy in T cells from aged donors is maintained by spermidine and correlates with function and vaccine responses
Source: eLife. 2020 Dec 15;9:e57950. doi: 10.7554/eLife.57950 (PMC7744099; doi:10.7554/eLife.57950)
Supplement: Figure 5—source data 1. [file elife-57950-fig5-data1.xlsx]

## Sheet: Figure 5d
												CD3/CD28						CD3/CD28 + GC7
											d1	0.888889	0.25	0.571429	0.769231	0.540541	0.875	0.222222	0.916667	0.428571	0.0769231	0.324324	0.625
											d2	0.888889	1.91667	0.714286	0.769231	1.2973	1.75	0.555556	0.5	0.571429	0.384615	0.243243	1.125
											d3	2.77778	1.33333	2.85714	3.46154	1.7027	2.5	0.111111	0.833333	1.42857	0.846154	0.297297	1.375
											d4	3	5.41667	2.57143	2.15385	2.16216	2.625	0.444444	0.583333	1.14286	0.153846	0.864865	0.375
											d5	2.111	1.66667	2.14286	1.30769	1.16216	1.125	0.222222	0.416667	1.28571	0.846154	0.351351	0.875
											d6	1.11111	1.33333	0.857143	1.53846	0.567568	1.5	0.777778	0.0833333	1.14286	0.461538	0.621622	0.875
											d7	1.33333	0.583333	0.857143	1.30769	0.702703	1.5	0.888889	0.5	0.714286	0.307692	0.432432	0.5

## Sheet: Figure 5e
TFEB
unstim	Vehicle	DFMO	DFMO + Spd
0.942453	5.24793	0.973333	6.85484
3.83188	5.19022	3.44758	9.30091
0.1	2.25356	1.84726	9.86264
0.2	8.29971	4.51943	6.3
0.238222	2.184	0.434973
Hyp
unstim	Vehicle	DFMO	DFMO + Spd
7.87786	13.6283	3.70607	9.91304
9.55556	13.9259	9.72569	12.3188
4.98775	6.60606	1.29902	7.40541
7.13058	11.5038	2.55869	7.98165

## Sheet: Figure 5f
TFEB
unstim	Old	Old+Spd
0.0104124	1.2	3.305
0.213103	0.838046	1.81333
0	0.488	1.23
0	1.36	2.295
Hyp
unstim	Old	Old+Spd
0	2.46237	4.80132
0.4	3.56641	4.05145
0	1.96	3.58
0	1.57	4.9
