# Supplementary material for: Autophagy in T cells from aged donors is maintained by spermidine and correlates with function and vaccine responses
Source: eLife journal article supplement (doi:10.7554/elife.57950), 2020-12-14
Supplement: supp [file elife_poa_e57950_Figure_1_figure_supplement_4_source_data_1.xlsx]

## Sheet: Figure 1—figure supplement 4
											Age	Sum peptide pool
											48	493
											36	355
											25	1170
											47	1708
											29	1675
											28	2393
											22	3305
											19	1545
											24	2762
											25	318
											30	888
											41	1518
											25	2165
											25	2180
											28	2555
											34	155
											48	1070
											23	530
											27	403
											25	217
											45	132
											66	227
											74	130
											69	847
											64	107
											71	565
											71	133
											71	543
											65	190
											67	235
											71	525
											72	363
											67	862
